# Supplementary material for: Development of Simple Sequence Repeat Markers and Genetic Diversity Evaluation of Mycocentrospora acerina in Yunnan Province, China
Source: MDPI journal article supplement (doi:10.3390/jof9090944), 2023-09-19
Supplement: s1 [file s1]

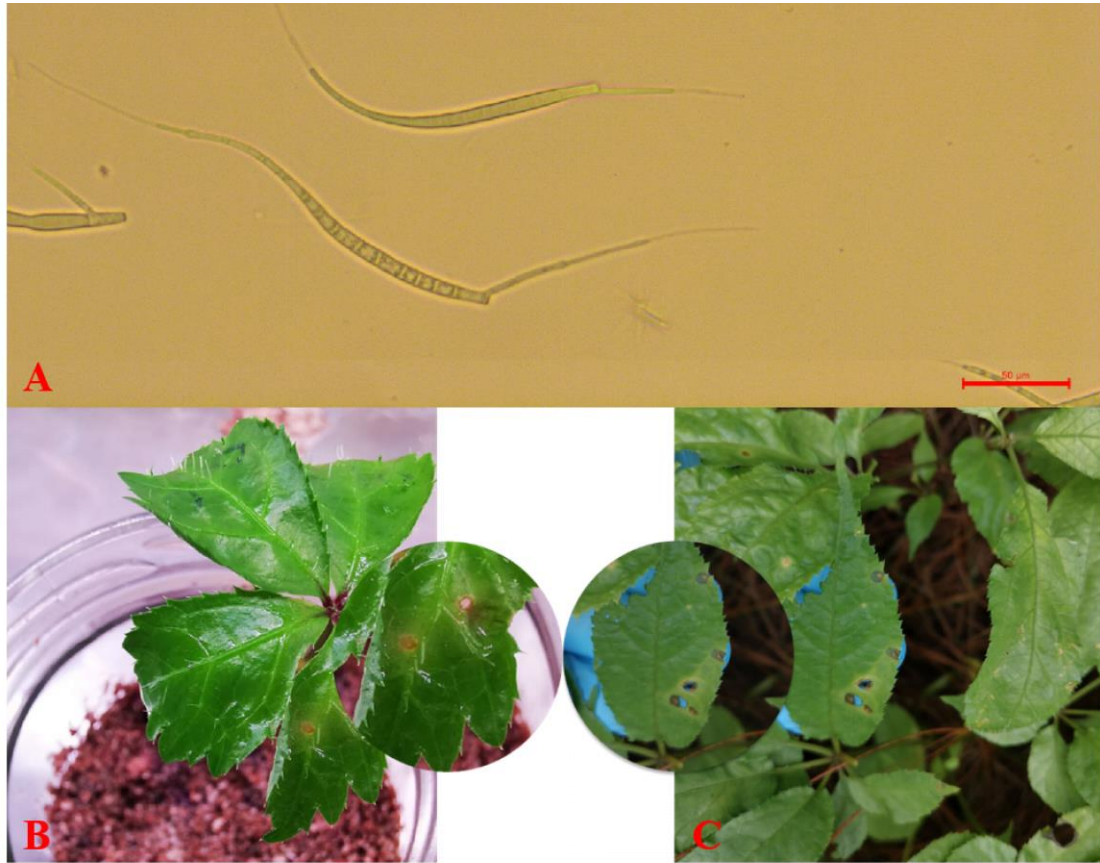

**Supplementary Figure 1** A: Conidia of *M.acerina* artificially induced in a petridish, the size of the conidia is  $(137.36\sim486.24\mu\text{m}) \times (4.35\sim16.46\mu\text{m})$  (n=100). B: The diseased spots of *P. notoginseng* leaves 4 days after inoculation with single conidia. C: Early lesions of round spot disease of *P. notoginseng*.

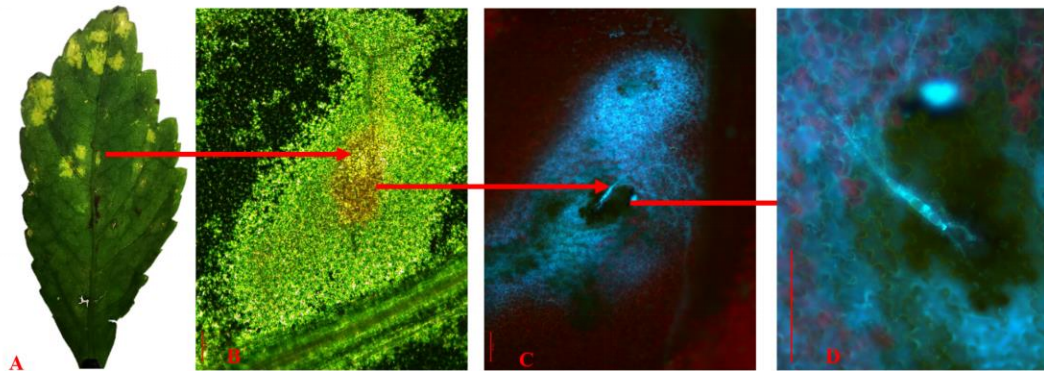

**Supplementary Figure 2** A: The diseased spots 72h after the inoculation of *P. notoginseng* leaves were sprayed with  $5 \times 10^3$  CFU/mL conidia suspension. B: the lesions magnified with an optical microscope. C: The inoculated *P. notoginseng* leaves were stained with fluorescent dye (Calcofluor white stain). A conidia can be seen on the lesion under the fluorescence microscope (Leica DM 2000). D: Conidia produced at the site of a diseased spot, bar=100 $\mu$ m.

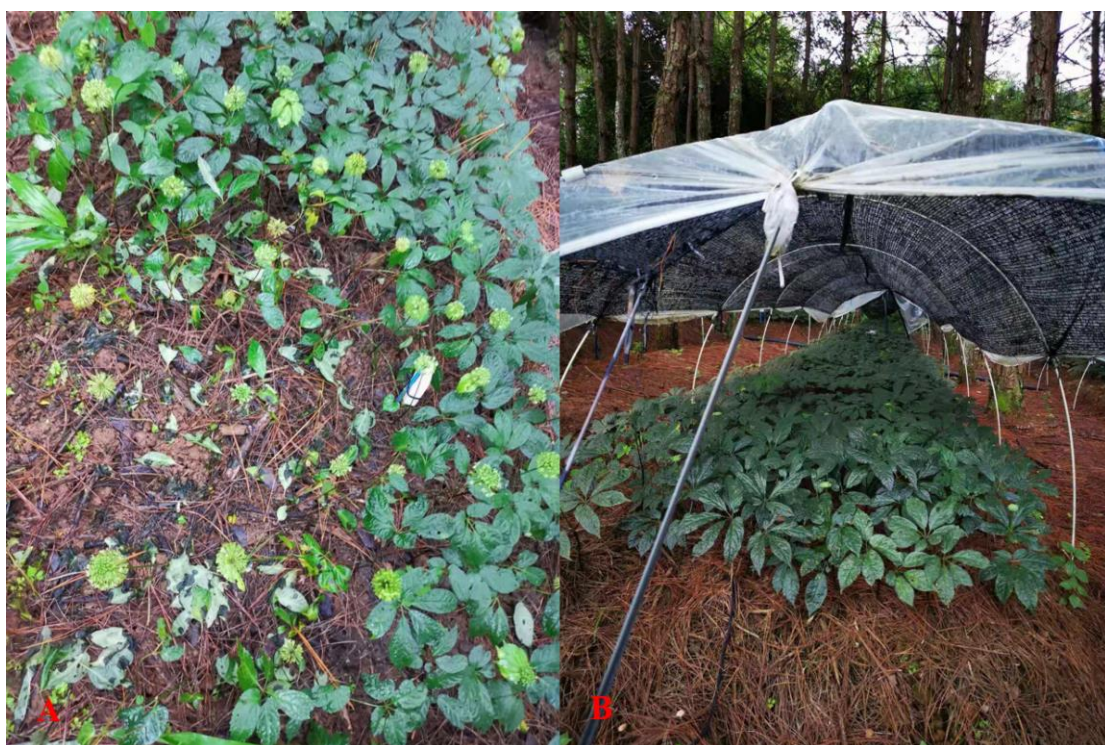

**Supplementary Figure 3** A: *Panax notoginseng* with serious incidence of round spot disease without shelter from rain. B: *P. notoginseng* cultivated in shelter from rain is growing well, and there is almost no occurrence of disease.

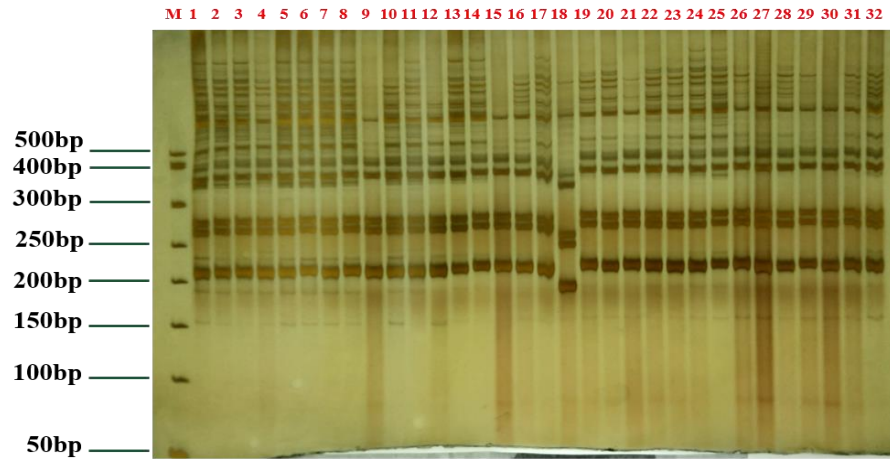

**Supplementary Figure 4** Representative result amplification pattern generated in part of *Mycoentrospora acerina* samples. Lanes M = DL50 marker; lanes 1 to 32 = partial *M. acerina* isolates.

**Supplementary table 1** *Mycocentrospora acerina* populations examined in the simple sequence repeat analysis.

| Location     | ID       | Population        | Isolates | Latitude (N) | Longitude (E) |
|--------------|----------|-------------------|----------|--------------|---------------|
| Honghe (HH)  | SC       | Shaochong, Honghe | 14       | 23° 54' 30"  | 102° 27' 53"  |
|              | LP       | Longpeng, Honghe  | 14       | 23° 58' 12"  | 102° 34' 13"  |
|              | JS (SZL) | Jianshui, Honghe  | 15       | 23° 24' 22"  | 102° 49' 58"  |
|              | LX (BS)  | Luxi, Honghe      | 13       | 24° 41' 14"  | 103° 51' 10"  |
|              | MZ       | Mengzi, Honghe    | 3        | 23° 37'      | 103° 40'      |
| Puer (PE)    | L        | Lancang, Puer     | 18       | 22° 40' 29"  | 99° 50' 49"   |
| Wenshan (WS) | YS       | Yanshan, Wenshan  | 1        | 23° 23' 4"   | 104° 16' 24"  |
|              | WS (PB)  | Wenshan, Wenshan  | 3        | 23° 14' 30"  | 104° 5' 0"    |
|              | DM       | Dumeng, Wenshan   | 6        | 23° 15' 42"  | 104° 8' 42"   |
|              | QL (LSJ) | Qiubei, Wenshan   | 6        | 23° 56' 25"  | 103° 48' 21"  |
|              | QX (XXZ) | Qiubei, Wenshan   | 14       | 23° 50' 2"   | 104° 6' 10"   |
| Qijing (QJ)  | QS (SDM) | Qiubei, Wenshan   | 12       | 23° 50' 23"  | 104° 6' 34"   |
|              | SZ (DYZ) | Shizong, Qijing   | 13       | 24° 75' 44"  | 103° 91' 78"  |
|              | LS (SYK) | Luoping, Qijing   | 17       | 24° 47' 47"  | 104° 17' 36"  |
| Kunming (KM) | SL (XJK) | Shilin, Kunming   | 12       | 24° 48' 31"  | 103° 38' 16"  |
|              | XD       | Xundian, Kunming  | 18       | 25° 44' 48"  | 103° 21'      |
| Lijiang (LJ) | LJ       | Lijiang           | 8        | 26° 86'      | 100° 25'      |

**Supplementary table 2** Tetra-nucleotide simple sequence repeat (SSR) motifs in the whole genome of *Mycocentrospora acerina*.

| <b>Motif</b> | <b>Number</b> | <b>Percentage<br/>(%)</b> | <b>Motif</b> | <b>Number</b> | <b>Percentage<br/>(%)</b> |
|--------------|---------------|---------------------------|--------------|---------------|---------------------------|
| AAAC         | 16            | 2.5                       | ACCT         | 45            | 7.02                      |
| AAAG         | 32            | 4.99                      | ACGC         | 4             | 0.62                      |
| AACC         | 24            | 3.74                      | ACGG         | 1             | 0.16                      |
| AACT         | 7             | 1.09                      | ACTG         | 29            | 4.52                      |
| AAGG         | 44            | 6.86                      | AGCC         | 13            | 2.03                      |
| AAGT         | 6             | 0.94                      | AGCG         | 3             | 0.47                      |
| AATC         | 67            | 10.45                     | AGCT         | 2             | 0.31                      |
| AATG         | 19            | 2.96                      | AGGC         | 14            | 2.18                      |
| ACAG         | 35            | 5.46                      | AGGG         | 14            | 2.18                      |
| ACAT         | 52            | 8.11                      | ATCC         | 80            | 12.48                     |
| ACCC         | 2             | 0.31                      | ATGC         | 7             | 1.09                      |
| ACCG         | 6             | 0.94                      | CCCG         | 1             | 0.16                      |



**Supplementary table 3** Penta-nucleotide simple sequence repeat (SSR) motifs in the whole genome of *Mycocentrospora acerina*.

| Motif | Number | Percentage (%) | Motif | Number | Percentage (%) | Motif | Number | Percentage (%) |
|-------|--------|----------------|-------|--------|----------------|-------|--------|----------------|
| AAAAC | 3      | 1.68           | AAAGG | 2      | 1.12           | AACAG | 1      | 0.56           |
| AAAAG | 2      | 1.12           | AAATC | 4      | 2.23           | AACCT | 2      | 1.12           |
| AAAAT | 1      | 0.56           | AAATG | 1      | 0.56           | AACGC | 2      | 1.12           |
| AAACT | 1      | 0.56           | AACAC | 12     | 6.7            | AACTC | 2      | 1.12           |
| AACTG | 2      | 1.12           | ACATC | 5      | 2.79           | AGAGC | 2      | 1.12           |
| AAGAC | 5      | 2.79           | ACATG | 1      | 0.56           | AGAGG | 4      | 2.23           |
| AAGAG | 4      | 2.23           | ACCAT | 3      | 1.68           | AGATC | 2      | 1.12           |
| AAGGC | 3      | 1.68           | ACCCT | 3      | 1.68           | AGATG | 9      | 5.03           |
| AAGGG | 3      | 1.68           | ACCGC | 1      | 0.56           | AGCAT | 1      | 0.56           |
| AAGGT | 1      | 0.56           | ACCTC | 3      | 1.68           | AGCCC | 1      | 0.56           |
| AAGTC | 2      | 1.12           | ACCTG | 1      | 0.56           | AGGAT | 2      | 1.12           |
| AAGTG | 2      | 1.12           | ACGAG | 2      | 1.12           | AGGGC | 6      | 3.35           |
| AATCC | 9      | 5.03           | ACGAT | 1      | 0.56           | AGGGG | 3      | 1.68           |
| AATCG | 1      | 0.56           | ACGCC | 2      | 1.12           | ATCCC | 5      | 2.79           |
| AATGG | 4      | 2.23           | ACGTC | 2      | 1.12           | ATCGC | 2      | 1.12           |
| AATGT | 2      | 1.12           | ACTAT | 2      | 1.12           | ATGCC | 3      | 1.68           |
| AATTC | 5      | 2.79           | ACTCC | 1      | 0.56           | ACAGG | 4      | 2.23           |
| ACACC | 5      | 2.79           | ACTCG | 2      | 1.12           | ACAGC | 3      | 1.68           |
| ACACG | 1      | 0.56           | ACTCT | 2      | 1.12           | ACTGG | 6      | 3.35           |
| ACACT | 4      | 2.23           | ACTGC | 1      | 0.56           |       |        |                |

**Supplementary table 4** Hexa-nucleotide simple sequence repeat (SSR) motifs in the whole genome of *Mycocentrospora acerina*

| Motif  | Number | Percentage (%) | Motif   | Number | Percentage (%) | Motif  | Number | Percentage (%) |
|--------|--------|----------------|---------|--------|----------------|--------|--------|----------------|
| AAAAAC | 1      | 0.33           | AACATG  | 1      | 0.33           | AAGGGC | 2      | 0.66           |
| AAAACC | 1      | 0.33           | AACCAC  | 3      | 0.99           | AAGGGG | 1      | 0.33           |
| AAAACG | 1      | 0.33           | AACCAG  | 1      | 0.33           | AAGGTG | 2      | 0.66           |
| AAAAGG | 1      | 0.33           | AACCCCT | 44     | 14.47          | AAGTAC | 1      | 0.33           |
| AAAATC | 1      | 0.33           | AACCGC  | 1      | 0.33           | AAGTGG | 7      | 2.30           |
| AAAATG | 1      | 0.33           | AACGAC  | 1      | 0.33           | AATACC | 1      | 0.33           |
| AAACGG | 1      | 0.33           | AACGAG  | 1      | 0.33           | AATACT | 2      | 0.66           |
| AAAGCC | 1      | 0.33           | AACGGC  | 1      | 0.33           | AATAGC | 5      | 1.64           |
| AAAGGG | 1      | 0.33           | AACTAC  | 4      | 1.32           | AATCAC | 3      | 0.99           |
| AAATAG | 1      | 0.33           | AACTAG  | 1      | 0.33           | AATCAG | 1      | 0.33           |
| AAATCC | 2      | 0.66           | AACTAT  | 1      | 0.33           | AATCCC | 1      | 0.33           |
| AAATGC | 1      | 0.33           | AACTTC  | 1      | 0.33           | AATGAC | 3      | 0.99           |
| AAATGG | 2      | 0.66           | AAGAGG  | 11     | 3.62           | AATGAG | 3      | 0.99           |
| AAATGT | 2      | 0.66           | AAGAGT  | 2      | 0.66           | AATGGC | 2      | 0.66           |
| AACAAG | 1      | 0.33           | AAGATG  | 4      | 1.32           | AATGTG | 5      | 1.64           |
| AACACC | 2      | 0.66           | AAGCAC  | 1      | 0.33           | ACACAG | 1      | 0.33           |
| AACACT | 1      | 0.33           | AAGCAG  | 2      | 0.66           | ACGATG | 1      | 0.33           |
| AACAGC | 5      | 1.64           | AAGGAC  | 2      | 0.66           | ACGCCC | 2      | 0.66           |
| AACATC | 5      | 1.64           | AAGGAG  | 3      | 0.99           | ACGTCC | 1      | 0.33           |
| ACACAT | 16     | 5.26           | ACTAGC  | 13     | 4.28           | ACCTCC | 2      | 0.66           |
| ACACCC | 1      | 0.33           | ACTCAT  | 1      | 0.33           | ACCTCT | 1      | 0.33           |
| ACACCT | 2      | 0.66           | ACTCCC  | 1      | 0.33           | ACCTGC | 8      | 2.63           |
| ACACGC | 1      | 0.33           | ACTCCG  | 1      | 0.33           | ACGACT | 1      | 0.33           |
| ACACTC | 1      | 0.33           | ACTCCT  | 2      | 0.66           | AGGGCG | 1      | 0.33           |



| Motif  | Number | Percentage (%) | Motif  | Number | Percentage (%) | Motif  | Number | Percentage (%) |
|--------|--------|----------------|--------|--------|----------------|--------|--------|----------------|
| ACACTG | 1      | 0.33           | ACTCTC | 4      | 1.32           | ATATCC | 1      | 0.33           |
| ACAGGC | 1      | 0.33           | ACTCTG | 1      | 0.33           | ATCCCC | 1      | 0.33           |
| ACAGTG | 1      | 0.33           | ACTGAG | 1      | 0.33           | ATCGCC | 13     | 4.28           |
| ACATCC | 1      | 0.33           | ACTGCC | 4      | 1.32           | ACCCTC | 2      | 0.66           |
| ACATGC | 2      | 0.66           | ACTGCG | 2      | 0.66           | ACCGTC | 2      | 0.66           |
| ACATGG | 1      | 0.33           | ACTGCT | 3      | 0.99           | AGCCTG | 1      | 0.33           |
| ACCACT | 3      | 0.99           | ACTGGG | 1      | 0.33           | AGGATG | 12     | 3.95           |
| ACCAGC | 17     | 5.59           | AGAGAT | 2      | 0.66           | ACCCAG | 1      | 0.33           |
| ACCATC | 2      | 0.66           | AGAGCC | 2      | 0.66           | ACCCGC | 3      | 0.99           |
| ACCATG | 1      | 0.33           | AGAGGC | 2      | 0.66           |        |        |                |
| AGAGGG | 5      | 1.64           | AGATGC | 1      | 0.33           |        |        |                |
